# Supplementary material for: A sustainable approach to synthesize phosphonated chitosan using ball milling and its application for oilfield scale management
Source: Royal Society of Chemistry journal article supplement (doi:10.1039/d2gc02102a), 2022-01-01
Supplement: d2gc02102a1.pdf [file d2gc02102a1.pdf]

## Sustainable Approach to Synthesis Phosphonated Chitosan Using Ball Milling and Its Application for Oilfield Scale Management

Mohamed F. Mady<sup>a,b\*</sup>, Eirik Haukereid<sup>a</sup>, Safwat Abdel-Azeim<sup>c</sup>, Ibnelwaleed A. Hussein<sup>d,e</sup>, and Malcolm A. Kelland<sup>a</sup>

<sup>a</sup>Department of Chemistry, Bioscience and Environmental Engineering, Faculty of Science and Technology, University of Stavanger, N-4036 Stavanger, Norway.

<sup>b</sup>Department of Green Chemistry, National Research Centre, Dokki, Cairo 12622, Egypt.

<sup>c</sup>Center of Integrative Petroleum Research (CIPR), College of Petroleum and Geosciences (CPG), King Fahd University of Petroleum and Minerals, Dhahran 31261, Saudi Arabia.

<sup>d</sup>Gas Processing Center, College of Engineering, P.O. Box 2713, Qatar University, Doha, Qatar.

<sup>e</sup>Department of Chemical Engineering, College of Engineering, P.O. Box 2713, Qatar University, Doha, Qatar.

Contents:

|                                                                                                                                                                                                                                                                                                          |       |
|----------------------------------------------------------------------------------------------------------------------------------------------------------------------------------------------------------------------------------------------------------------------------------------------------------|-------|
| <b>Figure S1.</b> Schematic diagram of NMR spectra of the <b>PCH</b> under ball-milling conditions: (a) <sup>1</sup> H NMR spectrum of <b>PCH</b> and zoom in on a spectral region coreesponded to -CH <sub>2</sub> -PO <sub>3</sub> H <sub>2</sub> and (b) <sup>31</sup> P NMR spectrum of <b>PCH</b> . | S2    |
| <b>Figure S2.</b> Schematic diagram of FTIR spectra of the <b>PCH</b> .                                                                                                                                                                                                                                  | S3    |
| <b>Figure S3.</b> The optimized structures of <b>ATMP</b> in conformation I, in which the two phosphonates are bi-chelating Ca <sup>2+</sup> . Key bond lengths are shown in Å, and the atomic color code is presented.                                                                                  | S3    |
| <b>Table S1.</b> Elemental analysis of <b>CH</b> and <b>PCH</b> and the substitution degree of <b>PCH</b> .                                                                                                                                                                                              | S4    |
| <b>Table S2.</b> Calcium tolerance tests at 30000 ppm (3 wt%) NaCl for <b>PCH</b>                                                                                                                                                                                                                        | S4    |
| The ratio of the molecular weight of the <b>PCH</b> to <b>CH</b> .                                                                                                                                                                                                                                       | S4-S5 |

**Figure S1.** Schematic diagram of NMR spectra of the **PCH** under ball-milling conditions: (a)  $^1\text{H}$  NMR spectrum of **PCH** and zoom in on a spectral region corresponded to  $-\text{CH}_2\text{-PO}_3\text{H}_2$  and (b)  $^{31}\text{P}$  NMR spectrum of **PCH**.

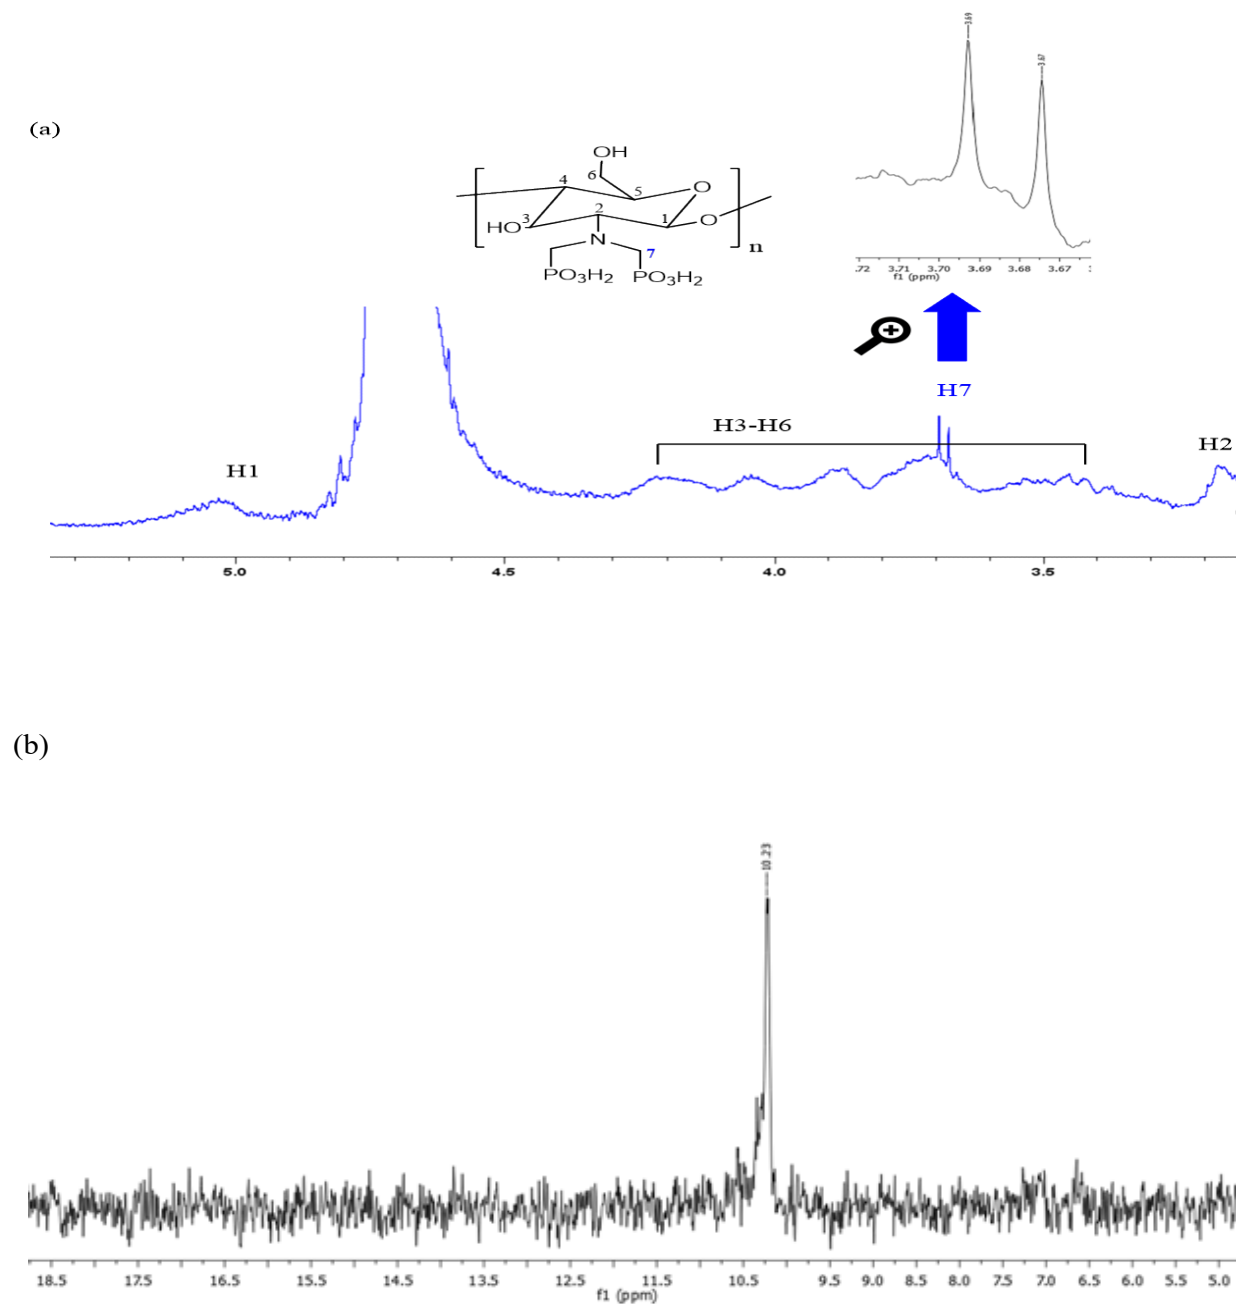

**Figure S2.** Schematic diagram of FTIR spectra of the **PCH**.

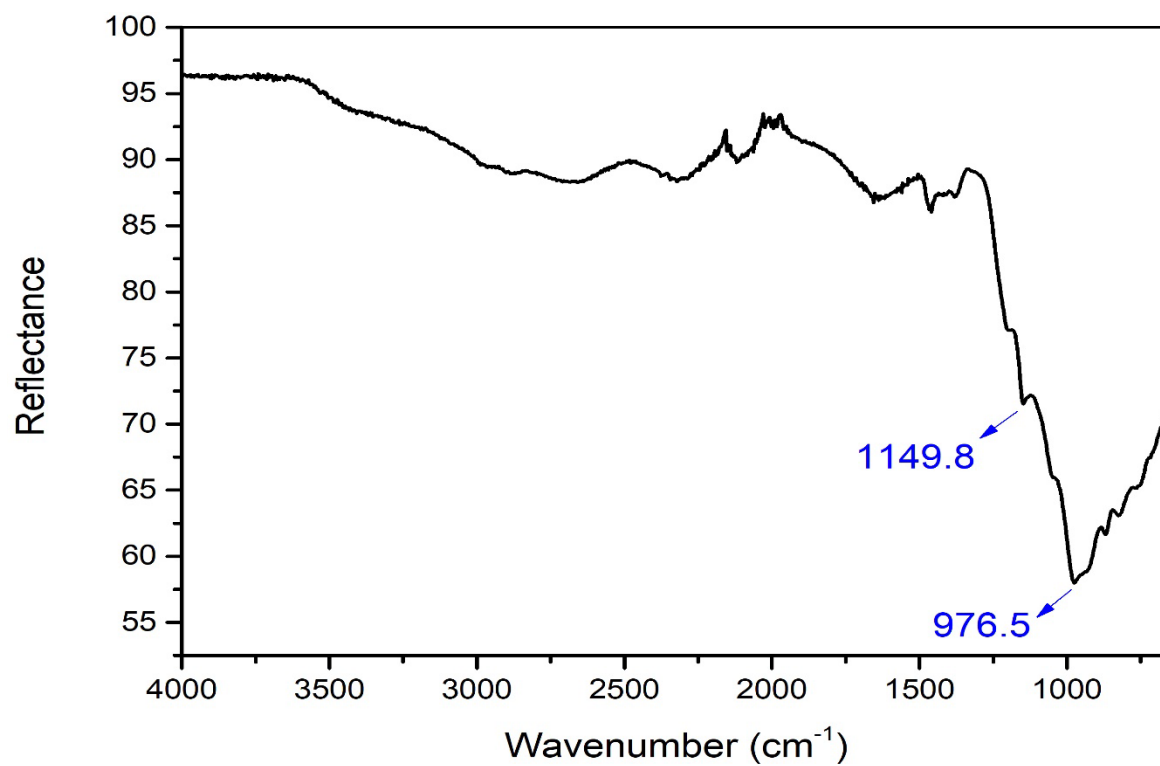

**Figure S3.** The optimized structures of **ATMP** in conformation I, in which the two phosphonates are bi-chelating  $\text{Ca}^{2+}$ . Key bond lengths are shown in Å, and the atomic color code is presented.

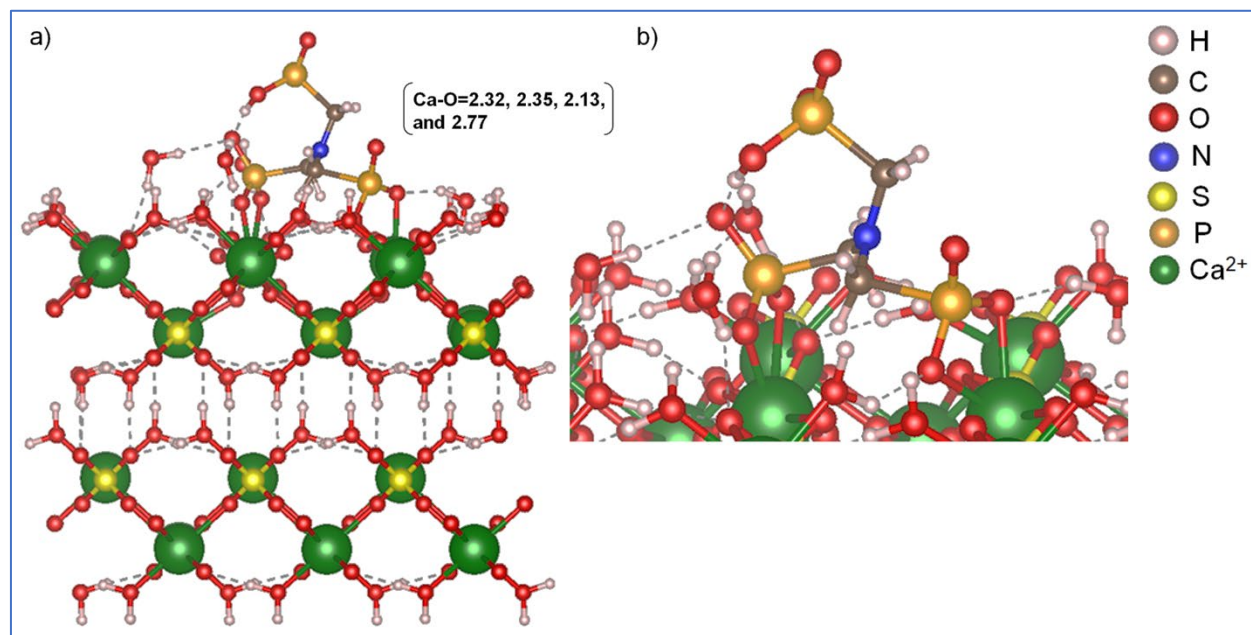

**Table S1.** Elemental analysis and substitution degree of **CH** and **PCH**.

|            | C     | N    | H    | C/N   | DS    |
|------------|-------|------|------|-------|-------|
| <b>CH</b>  | 40.46 | 7.28 | 7.4  | 6.48  |       |
| <b>PCH</b> | 23.16 | 3.63 | 4.96 | 7.438 | 0.956 |

**Table S2.** Calcium tolerance tests at 30000 ppm (3 wt%) NaCl for **PCH**.

| SI         | Ca <sup>2+</sup><br>dose<br>(ppm) | SI<br>dose<br>(ppm) | Appearance      |               |        |         |          |
|------------|-----------------------------------|---------------------|-----------------|---------------|--------|---------|----------|
|            |                                   |                     | after<br>mixing | 30<br>minutes | 1 hour | 4 hours | 24 hours |
| <b>PCH</b> | 100                               | 100                 | clear           | clear         | clear  | clear   | clear    |
|            |                                   | 1000                | clear           | clear         | clear  | clear   | clear    |
|            |                                   | 10000               | clear           | clear         | clear  | clear   | clear    |
|            |                                   | 50000               | clear           | clear         | clear  | clear   | clear    |
|            | 1000                              | 100                 | clear           | clear         | clear  | clear   | clear    |
|            |                                   | 1000                | clear           | clear         | clear  | clear   | clear    |
|            |                                   | 10000               | clear           | clear         | clear  | clear   | clear    |
|            |                                   | 50000               | clear           | clear         | clear  | clear   | clear    |
|            | 10000                             | 100                 | clear           | clear         | clear  | clear   | clear    |
|            |                                   | 1000                | clear           | clear         | clear  | clear   | clear    |
|            |                                   | 10000               | clear           | clear         | clear  | clear   | clear    |
|            |                                   | 50000               | clear           | clear         | clear  | clear   | clear    |

**The ratio of the molecular weight of the PCH to CH:**

The molecular weight of the chitosan and phosphonated chitosan was determined using the Mark–Houwink–Sakurada equation.<sup>1,2</sup>

$$[\eta] = kM_v^a \quad (1)$$

Where

$[\eta]$  = intrinsic viscosity, cm<sup>3</sup>/g

$M_v$  = the viscosity-average molecular weight, g/mol

k and a = The Mark-Houwink\* constants for a given solute-solvent system

the values of the constants a (0.74) and k (0.00181 cm<sup>3</sup>/g) and were found in the literature for 0.1 m acetic acid /0.2 m nacl 0.2 mol/l (medium 2) at 25 °c<sup>3</sup>.

Intrinsic viscosity is defined as:

$$[\eta] = \lim_{c \rightarrow 0} \frac{\eta_{sp}}{c} \quad (2)$$

$\eta_{sp}$  = the specific viscosity

c = the concentration

$$\eta_{sp} = \frac{\eta - \eta_o}{\eta_o} = \eta_r - 1 \quad (3)$$

$$\eta_r = \frac{\eta}{\eta_o} \quad (4)$$

where

$\eta_{sp}$  = the specific viscosity

$\eta_r$  = the relative viscosity

$\eta$  = the solution viscosity

$\eta_o$  = the viscosity of the pure solvent

The ratio of the intrinsic viscosity of the phosphonated chitosan to the intrinsic viscosity of the chitosan is found to be 0.74. Moreover, the ratio of the molecular weight of the phosphonated chitosan to the chitosan is 0.67.

## Refernces

- 1 H. Mark, *Hirzel, Leipzig*, 1938, **103**, 391–456.
- 2 R. Houwink, *Journal für praktische Chemie*, 1940, **157**, 15–18.
- 3 C. N. Costa, V. G. Teixeira, M. C. Delpech, J. V. S. Souza and M. A. S. Costa, *Carbohydrate Polymers*, 2015, **133**, 245–250.
